# Supplementary material for: The Economics of Censorship Resistance
Source: Royal Society of Chemistry journal article supplement (doi:10.1039/c8tb02673d), 2004-01-01
Supplement: c8tb02673d1.pdf [file c8tb02673d1.pdf]

## NIR triggered release of DOX from sophorolipids coated mesoporous carbon nanoparticle with phase change 1-tetradecanol to treat MCF-7/ADR cell

### Supplementary Info:

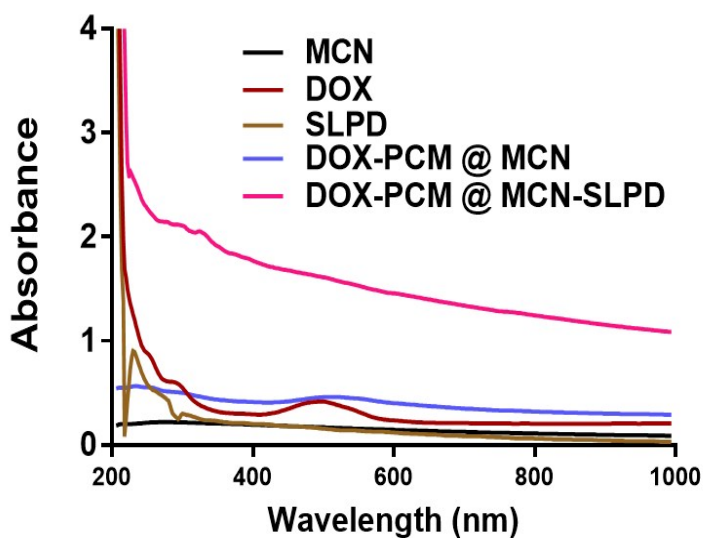

**Fig S1.** UV-Vis-NIR spectra of DOX, SLPD, MCN, DOX-PCM@MCN, DOX-PCM@MCNs-SLPD

**Table. S1.** Zeta potentials of DOX-PCM@MCN-SLPD before and after NIR irradiation

| Sample                                    | Zeta potential mV |
|-------------------------------------------|-------------------|
| DOX-PCM@MCN-SLPD (before NIR irradiation) | -10.2 ± 1.5       |
| DOX-PCM@MCN-SLPD (after NIR irradiation)  | -25.5 ± 0.5       |

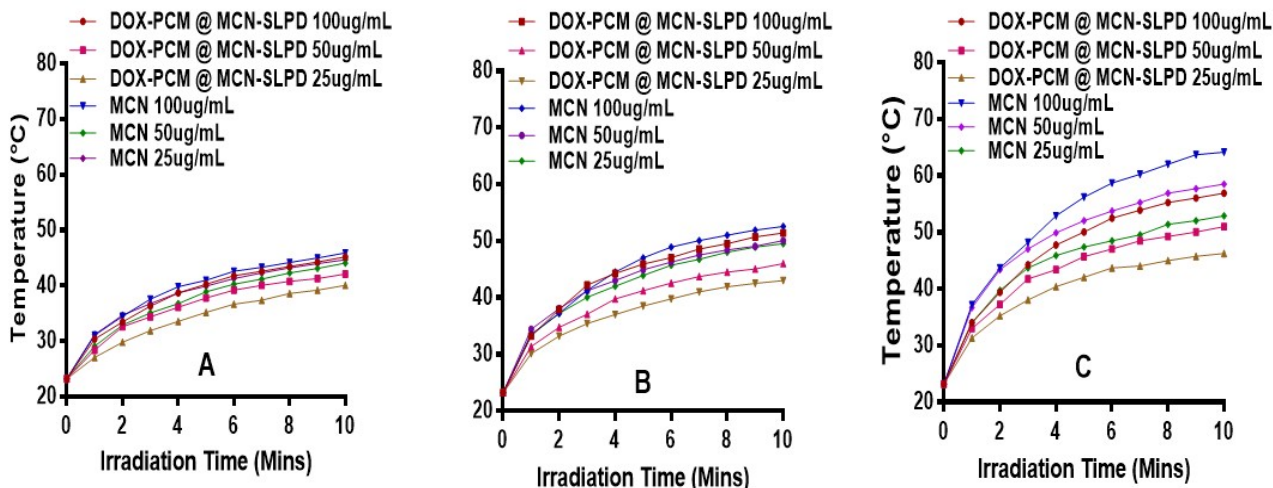

**Fig S2.** The temperature variation curve of different concentration (100 ug/mL **A**, 50 ug/mL **B**, 25 ug/mL **C**) of MCN and DOX-PCM@MCNs-SLPDs at different intensity under NIR irradiation (808 nm wavelength), the initial temperature was 23°C and the irradiation time was 10 min, the temperature was recorded every 1 minute.

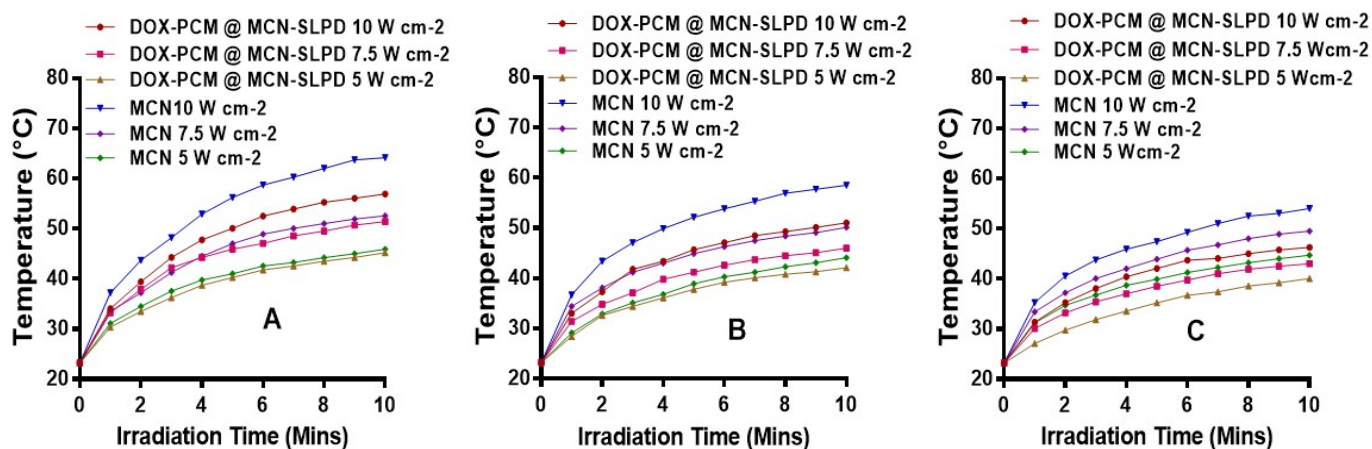

**Fig S3.** The temperature variation curve of different concentration of MCN and DOX-PCM@MCNs-SLPDs at different intensity 5 w/cm<sup>2</sup> (**A**), 7.5 w/cm<sup>2</sup> (**B**), 10 w/cm<sup>2</sup> (**C**) under NIR irradiation (808 nm wavelength), the initial temperature was 23°C and the irradiation time was 10 min, the temperature was recorded every 1 minute.

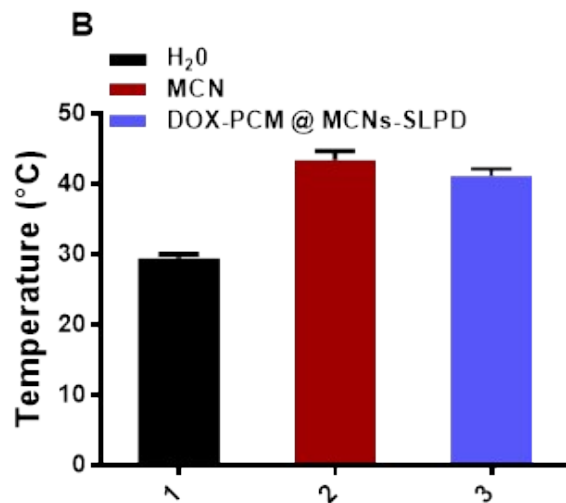

**Fig.S4.** The temperature difference measurement of MCN and DOX-PCM@MCN-SLPD

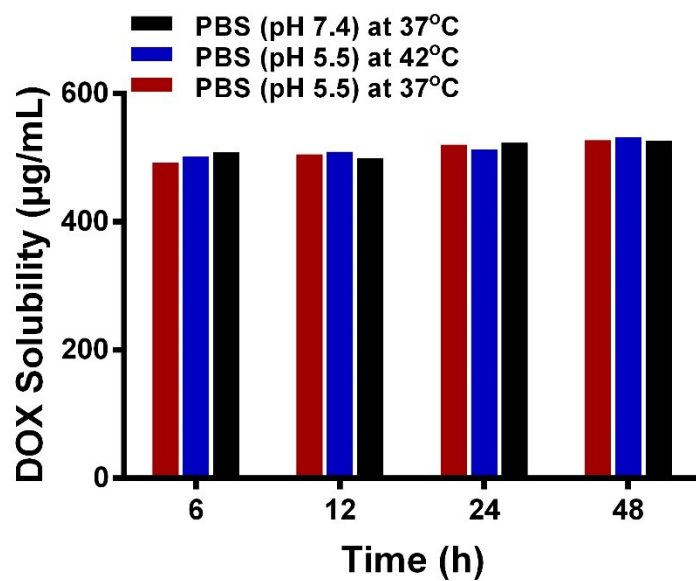

**Fig.S5.** Evaluation of DOX solubility at different temperature and different time.

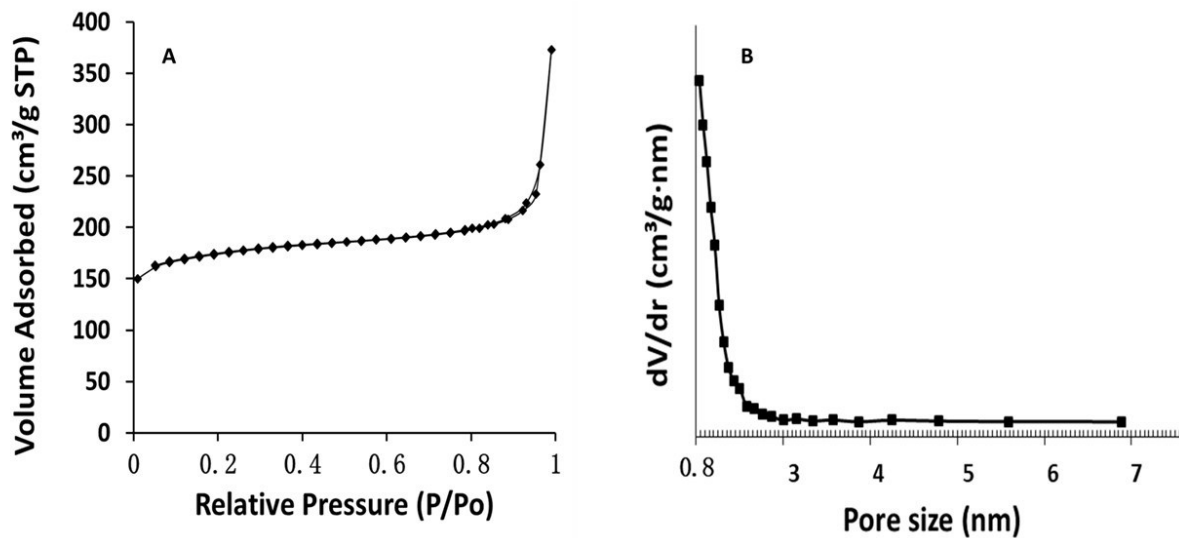

**Fig. S6. (A)** N<sub>2</sub> adsorption desorption isotherm of MCNs. (BET surface area of 541.62 m<sup>2</sup> g<sup>-1</sup>, a total pore volume of 0.34 cm<sup>3</sup> g<sup>-1</sup>). **(B)** Pore size distribution curve of MCN (An average pore size recorded was 2.5 nm)
